# Supplementary material for: Progress in managing the transition from the RS92 to the Vaisala RS41 as the operational radiosonde within the GCOS Reference Upper-Air Network
Source: Copernicus journal article supplement (doi:10.5194/gi-2019-36), 2019-12-05
Supplement: Supplementary file [file gi-2019-36-AC1-supplement.pdf]

[Review comments in red, author response in black]

Reviewer #1

The title is rather long and likely a better title can be found. It does not need to be so specific. Suggestions from my side are: "Managing the transition from Vaisala RS92 to RS41 radiosondes within the GRUAN: a progress report" or "Fully traceable switch from Vaisala RS92 to RS41 radiosondes within the GRUAN: a progress report". I think one should either write GRUAN or "Global Climate Observing System Reference Upper-Air Network", since there will be few readers who know GCOS but do not know GRUAN.

Thank you for the suggestion. We will change the title to "Managing the transition from Vaisala RS92 to RS41 radiosondes within the Global Climate Observing System Reference Upper-Air Network (GRUAN): a progress report"

There is some redundancy in stating the importance of characterizing the errors and differences. For example, the description of differences with the transition handling at Tateno (1130-136) could be omitted.

We would prefer to keep the lines 130-136 because they summarize the differences in the scale of the approaches between:

- a) an instrument change at a single site and in contrast,
- b) the GRUAN approach to maintain the consistency of the data records at multiple sites within a network, which includes a coordinated network-wide effort, an extensive laboratory characterization, and the call on expertise from various fields that are represented in the network.
